# Supplementary material for: Clinical Characterization of Patients with Chronic Spontaneous Urticaria according to Anti-TPO IgE Levels
Source: PubMed Central journal article supplement (PMC6925798; doi:10.1155/2019/4202145), 2019-12-07
Supplement: 4202145.f1.pdf [file 4202145.f1.pdf]

**Supplementary material.**

**Supplementary table 1.**

| Inducible urticaria according to challenge test | (+) Anti-TPO IgE (n 43) | Group 1 (n 18) | Group 2 (n 12) | Group 3 (n 13) | p    |
|-------------------------------------------------|-------------------------|----------------|----------------|----------------|------|
| Patients with any inducible urticaria           | 10 (23.2%)              | 5              | 3              | 2              | 0.14 |
| <i>Dermographism</i>                            | 7 (16.2%)               | 4              | 2              | 1              | 0.13 |
| <i>Pressure</i>                                 | 1 (2.3%)                | 1              | 0              | 0              | N/A  |
| <i>Ice</i>                                      | 2 (4.6%)                | 1              | 1              | 0              | N/A  |
| <i>Water</i>                                    | 0                       | 0              | 0              | 0              | N/A  |
| <i>Excercise/cholinergic</i>                    | 0                       | 0              | 0              | 0              | N/A  |

**Supplementary Table 1.** Physical challenge tests stratified by anti-TPO groups. Comparison of anti-TPO IgE groups. **Group 1:** patients with anti-TPO IgE during the clinical control period and significantly increased levels during an exacerbation (n=18). **Group 2:** patients with anti-TPO IgE during the clinical control period with no increase during an exacerbation (n= 12) **Group 3:** patients with anti-TPO IgE only during an exacerbation (n= 13). N/A, not applicable.

**Supplementary table 2.**

| NSAID challenge      | Positive challenge | (+) Anti-TPO IgE (n 43) | Group 1 (n 18) | Group 2 (n 12) | Group 3 (n 13) | P    |
|----------------------|--------------------|-------------------------|----------------|----------------|----------------|------|
| Any NSAID (total 46) | 14                 | 10 (23.2%)              | 4              | 3              | 3              | 0.14 |
| Ibuprofen (20)       | 8                  | 6 (11.6%)               | 2              | 2              | 2              | 0.15 |
| ASA (10)             | 5                  | 3 (6.9%)                | 1              | 1              | 1              | 0.14 |
| Meloxicam (10)       | 1                  | 1 (2.3%)                | 1              | 0              | 0              | N/A  |
| Acetaminophen (6)    | 0                  | 0                       | 0              | 0              | 0              | N/A  |

**Supplementary Table 2.** NSAID challenge tests stratified by anti-TPO groups. *P* value for anti-TPO IgE groups. **Group 1:** patients with anti-TPO IgE during the clinical control period and significantly increased levels during an exacerbation (n=18). **Group 2:** patients with anti-TPO IgE during the clinical control period with no increase during an exacerbation (n=12) **Group 3:** patients with anti-TPO IgE only during an exacerbation (n=13). N/A, not applicable. ASA, acetylsalicylic acid.
